# Supplementary material
Source: PubMed Central journal article supplement (PMC7063861)

**Supplemental Table 1.** Multivariable logistic regression of association of variables with neoadjuvant chemotherapy adjustment for renal function (n=366 patients).

| Variable                 | OR   | 95% CI | P value |
|--------------------------|------|--------|---------|
| Hispanic                 | 0.59 | 0.28-  | 0.17    |
| Age                      | 0.95 | 1.24   | 0.03    |
|                          |      | 0.92-  |         |
|                          |      | 0.99   |         |
| Sex (female)             | 1.34 | 0.53-  | 0.53    |
|                          |      | 3.34   |         |
| BMI (kg/m <sup>2</sup> ) | 0.99 | 0.92-  | 0.75    |
|                          |      | 1.06   |         |
| Comorbidity Index        | 0.71 | 0.48-  | 0.09    |
|                          |      | 1.06   |         |
| Distance (miles)         | 1.08 | 0.82-  | 0.60    |
|                          |      | 1.42   |         |
| Pathologic T stage       | 1.04 | 0.86-  | 0.70    |
|                          |      | 1.26   |         |
| Creatinine (mg/dL)       | 1.25 | 0.76-  | 0.38    |
|                          |      | 2.05   |         |
| Median Income            | 0.93 | 0.76-  | 0.48    |
|                          |      | 1.14   |         |
| Percent Education        | 0.98 | 0.95-  | 0.36    |
|                          |      | 1.02   |         |

**Supplemental Table 2.** Multivariable logistic regression of association of variables with laparoscopic cystectomy excluding patients enrolled in laparoscopic vs. open randomized trial (Total n=315 patients).

| Variable                 | OR   | 95% CI | P value |
|--------------------------|------|--------|---------|
| Hispanic                 | 1.34 | 0.49-  | 0.56    |
| Age                      | 1.03 | 3.64   | 0.29    |
|                          |      | 0.97-  |         |
|                          |      | 1.09   |         |
| Sex (female)             | 0.87 | 0.26-  | 0.81    |
|                          |      | 2.85   |         |
| BMI (kg/m <sup>2</sup> ) | 1.02 | 0.92-  | 0.69    |
|                          |      | 1.13   |         |
| Comorbidity Index        | 1.31 | 0.83-  | 0.24    |
|                          |      | 2.05   |         |
| Distance (miles)         | 1.03 | 0.71-  | 0.87    |
|                          |      | 1.49   |         |
| Pathologic T stage       | 0.85 | 0.66-  | 0.19    |
|                          |      | 1.09   |         |

|                    |      |           |      |
|--------------------|------|-----------|------|
| Creatinine (mg/dL) | 0.90 | 0.40-2.06 | 0.81 |
| Median Income      | 1.01 | 0.79-1.30 | 0.92 |
| Percent Education  | 0.99 | 0.93-1.04 | 0.60 |

**Supplemental Table 3.** Multivariable linear regression of association of variables with number of lymph nodes removed excluding patients enrolled in extended vs. standard randomized trial (Total n=310 patients).

| Variable                 | Coefficient<br>t | 95% CI     | P value |
|--------------------------|------------------|------------|---------|
| Hispanic                 | -1.06            | -4.16-2.04 | 0.50    |
| Age                      | -0.15            | -0.32-0.02 | 0.08    |
| Sex (female)             | -1.84            | -5.83-2.16 | 0.38    |
| BMI (kg/m <sup>2</sup> ) | 0.14             | -0.17-0.45 | 0.37    |
| Comorbidity Index        | -0.45            | -2.00-1.11 | 0.57    |
| Distance (miles)         | 0.85             | -0.31-2.01 | 0.15    |
| Pathologic T stage       | -0.68            | -1.48-0.11 | 0.09    |
| Creatinine (mg/dL)       | -0.64            | -2.93-1.64 | 0.58    |
| Median Income            | 0.39             | -0.46-1.25 | 0.37    |
| Percent Education        | 0.01             | -0.15-0.17 | 0.90    |

**Supplemental Table 4.** Multivariable logistic regression of association of variables with urinary diversion, including patients with no serum creatinine value available (Total n=507).

| Variable                 | OR   | 95% CI        | P value |
|--------------------------|------|---------------|---------|
| Hispanic                 | 0.41 | 0.16-         | 0.05    |
| Age                      | 0.96 | 1.03<br>0.92- | 0.10    |
|                          |      | 1.01          |         |
| Sex (female)             | 0.16 | 0.0-0.84      | 0.03    |
| BMI (kg/m <sup>2</sup> ) | 1.06 | 0.97-         | 0.18    |
|                          |      | 1.15          |         |
| Comorbidity<br>Index     | 0.42 | 0.21-         | 0.01    |
|                          |      | 0.81          |         |
| Distance (miles)         | 0.96 | 0.69-         | 0.83    |
|                          |      | 1.35          |         |
| Pathologic T<br>stage    | 0.94 | 0.75-         | 0.56    |
|                          |      | 1.17          |         |
| Median Income            | 0.99 | 0.77-         | 0.92    |
|                          |      | 1.27          |         |
| Percent<br>Education     | 1.00 | 0.96-         | 1.00    |
|                          |      | 1.04          |         |

**Supplement Figure S1. Summary Panel: A heatmap of patient covariates.**

Unsupervised hierarchical clustering based on clinical covariates after they have been centered and scaled around zero.

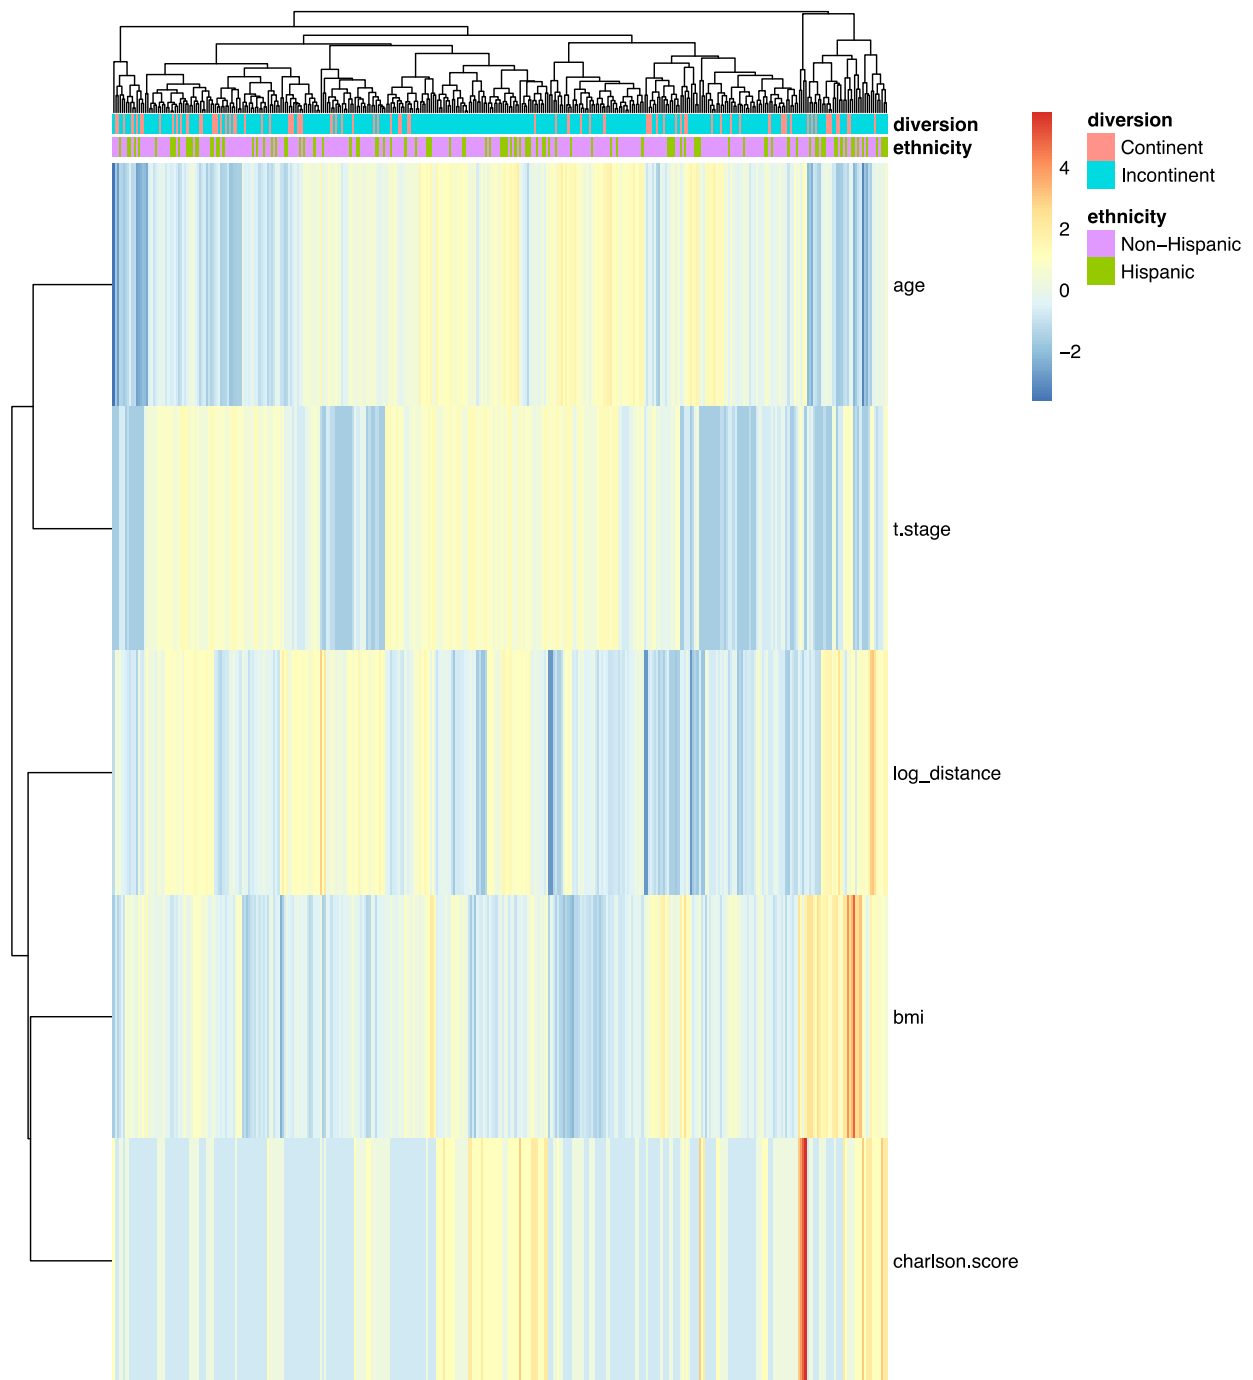

**Supplement Figure S2. Odds of receipt of outcome measures across sex and age.** Adjusted odds ratio with 95% confidence interval looking at receipt of treatment modality across age range and ethnicity with all other variables in model held constant.

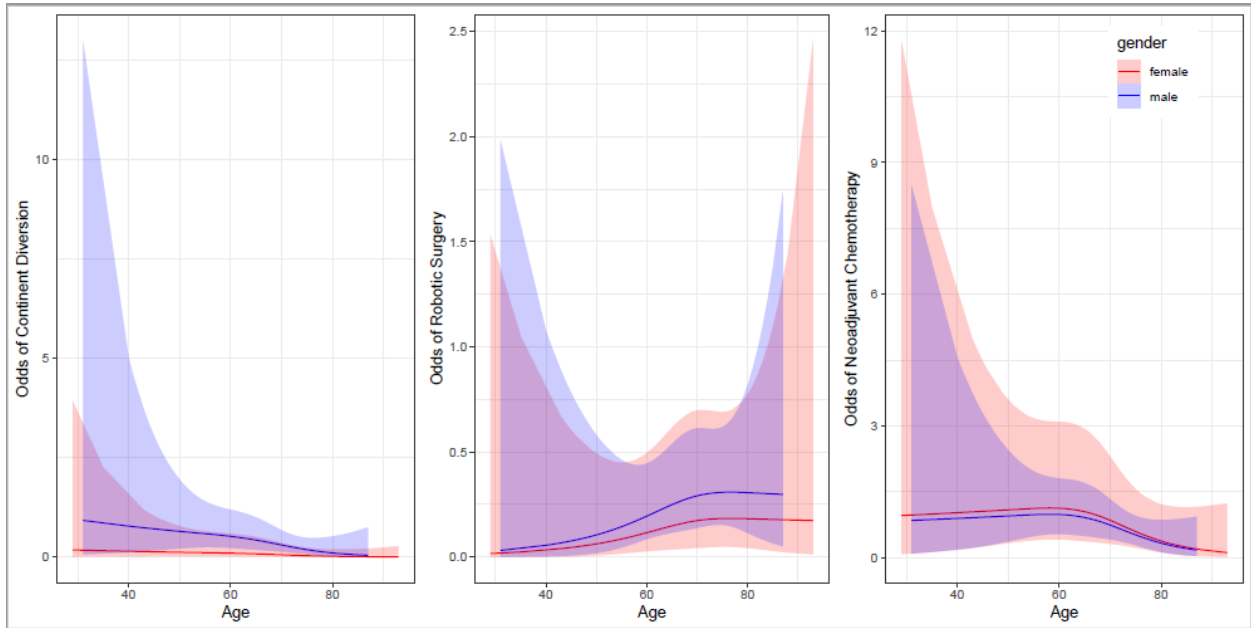

Supplement: NIHMS1558246-supplement-Supplement.pdf [file NIHMS1558246-supplement-Supplement.pdf]
